# Supplementary material for: A Comparison of Two Spelling Brain-Computer Interfaces Based on Visual P3 and SSVEP in Locked-In Syndrome
Source: PubMed Central journal article supplement (PMC3783473; doi:10.1371/journal.pone.0073691), 2013-09-25
Supplement: pone.0073691.s002.pdf [file pone.0073691.s002.pdf]

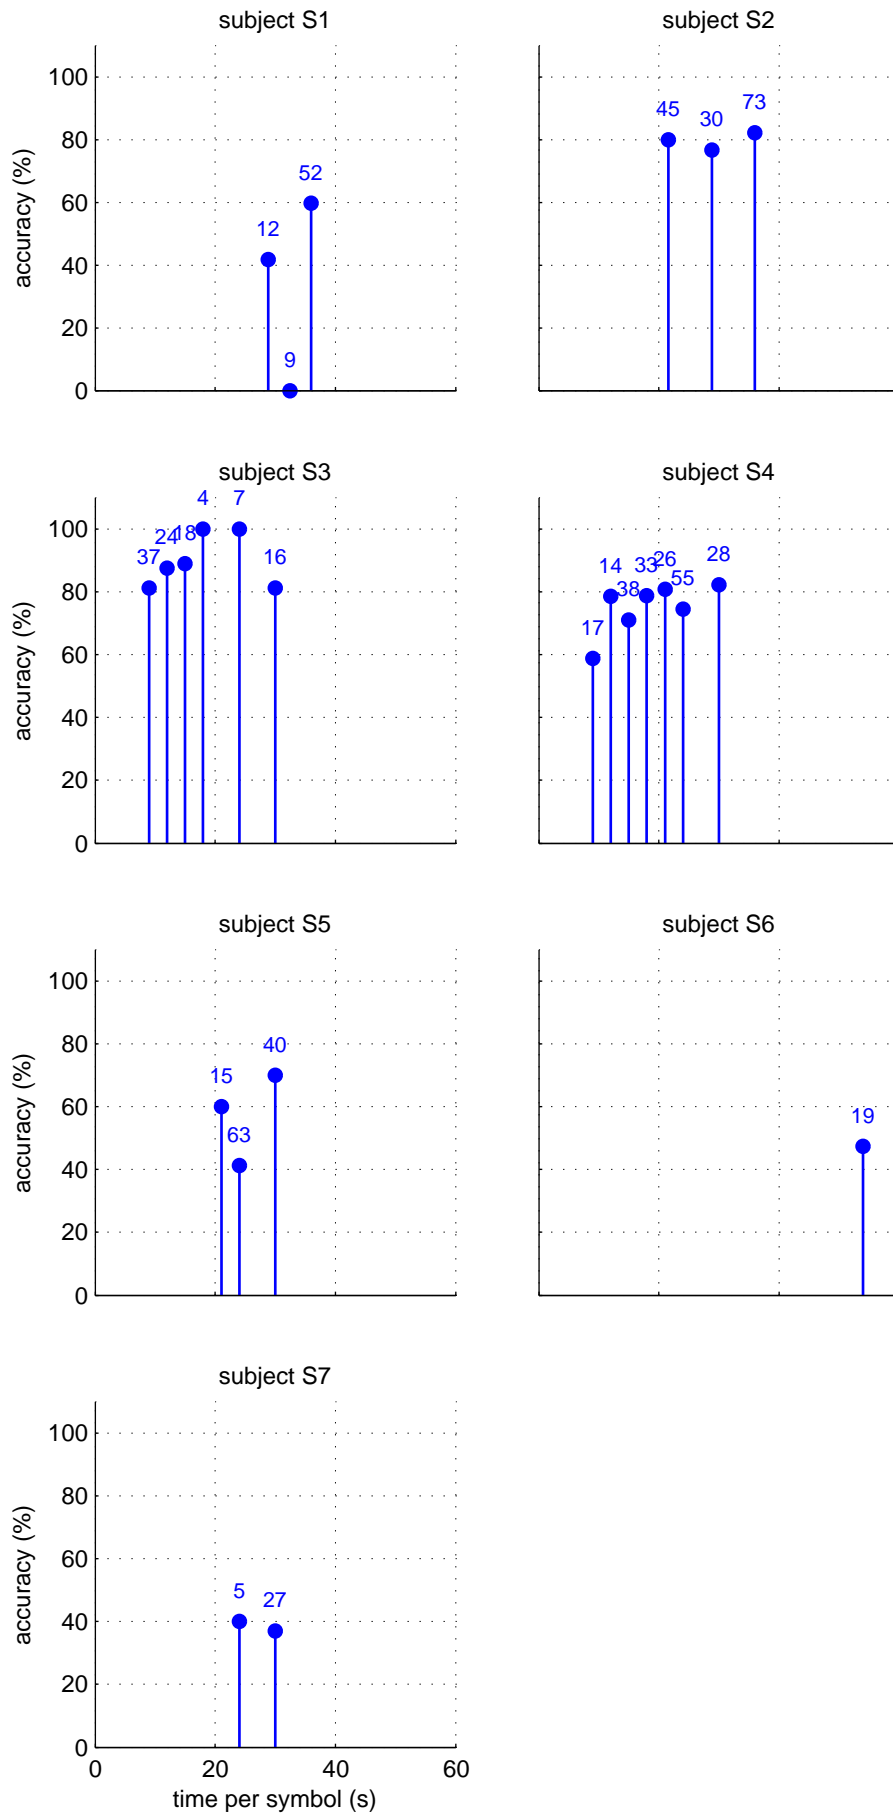

**Figure 1.** Detection accuracies for the P3-based BCI and each patient with respect to the stimulation time per symbol. The figure above each data point represents the number of symbols communicated.

**Table 1.** detailed results for patient 1 per session using the P3-based BCI. NR represents the number of repetitions, TST the total stimulation time in seconds corresponding to the communication of all symbol, SST the stimulation time in seconds corresponding to the communication of one symbol (average for the total line), CR the correctness ratio (number of correctly detected symbol *w.r.t.* total number of typed symbols) and the corresponding accuracy (%) and ITR the Information Transfer Rate.

| NR    | session 1 |     |               |       | session 2 |       |               |       | all sessions |       |               |       |
|-------|-----------|-----|---------------|-------|-----------|-------|---------------|-------|--------------|-------|---------------|-------|
|       | TST       | SST | CR            | ITR   | TST       | SST   | CR            | ITR   | TST          | SST   | CR            | ITR   |
| 10    | 1188      | 36  | 18/33 (54.55) | 3.074 | 684       | 36    | 13/19 (68.42) | 4.417 | 1872         | 36    | 31/52 (59.62) | 3.542 |
| 9     | -         | -   | -             | -     | 291.6     | 32.4  | 0/9 (0)       | 0     | 291.6        | 32.4  | 0/9 (0)       | 0     |
| 8     | -         | -   | -             | -     | 345.6     | 28.8  | 5/12 (41.67)  | 2.496 | 345.6        | 28.8  | 5/12 (41.67)  | 2.496 |
| total | 1188      | 36  | 18/33 (54.55) | 3.074 | 1321      | 33.03 | 18/40 (45)    | 2.463 | 2509         | 34.37 | 36/73 (49.32) | 2.741 |

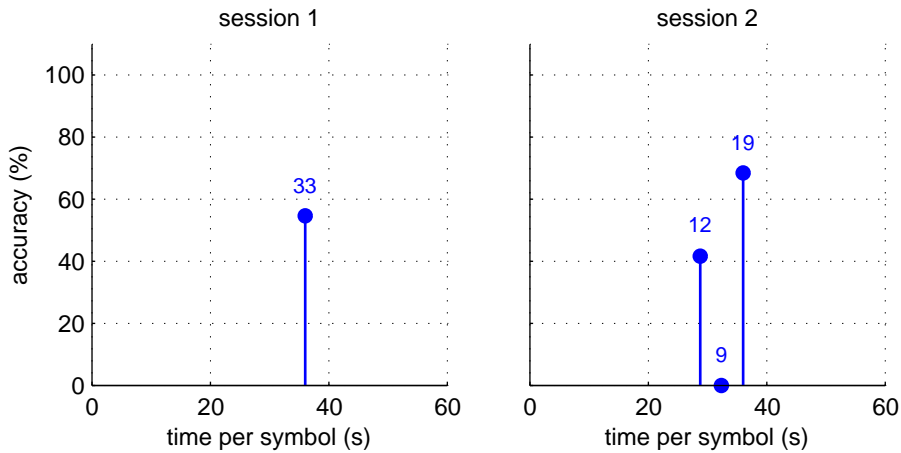

**Figure 2.** Detection accuracies for each session with patient 1 using the P3-based BCI with respect to the stimulation time per symbol. The figure above each data point represents the number of symbols communicated.

**Table 2.** detailed results for patient 2 per session using the P3-based BCI. NR represents the number of repetitions, TST the total stimulation time in seconds corresponding to the communication of all symbol, SST the stimulation time in seconds corresponding to the communication of one symbol (average for the total line), CR the correctness ratio (number of correctly detected symbol *w.r.t.* total number of typed symbols) and the corresponding accuracy (%) and ITR the Information Transfer Rate.

| NR    | session 1 |       |               |       | session 2 |       |                |       | all sessions |       |                 |       |
|-------|-----------|-------|---------------|-------|-----------|-------|----------------|-------|--------------|-------|-----------------|-------|
|       | TST       | SST   | CR            | ITR   | TST       | SST   | CR             | ITR   | TST          | SST   | CR              | ITR   |
| 10    | 1296      | 36    | 27/36 (75)    | 5.127 | 1332      | 36    | 33/37 (89.19)  | 6.869 | 2628         | 36    | 60/73 (82.19)   | 5.968 |
| 8     | 316.8     | 28.8  | 8/11 (72.73)  | 6.095 | 547.2     | 28.8  | 15/19 (78.95)  | 6.974 | 864          | 28.8  | 23/30 (76.67)   | 6.644 |
| 6     | -         | -     | -             | -     | 972       | 21.6  | 36/45 (80)     | 9.506 | 972          | 21.6  | 36/45 (80)      | 9.506 |
| total | 1613      | 34.31 | 35/47 (74.47) | 5.317 | 2851      | 28.23 | 84/101 (83.17) | 7.764 | 4464         | 30.16 | 119/148 (80.41) | 6.865 |

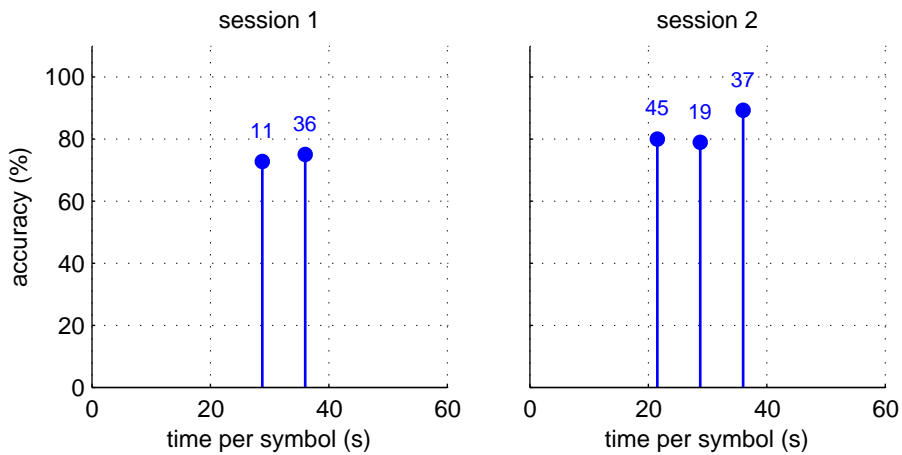

**Figure 3.** Detection accuracies for each session with patient 2 using the P3-based BCI with respect to the stimulation time per symbol. The figure above each data point represents the number of symbols communicated.

**Table 3.** detailed results for patient 3 per session using the P3-based BCI. NR represents the number of repetitions, TST the total stimulation time in seconds corresponding to the communication of all symbol, SST the stimulation time in seconds corresponding to the communication of one symbol (average for the total line), CR the correctness ratio (number of correctly detected symbol *w.r.t.* total number of typed symbols) and the corresponding accuracy (%) and ITR the Information Transfer Rate.

| NR    | session 1 |       |               |       | session 2 |       |               |       | all sessions |      |                |       |
|-------|-----------|-------|---------------|-------|-----------|-------|---------------|-------|--------------|------|----------------|-------|
|       | TST       | SST   | CR            | ITR   | TST       | SST   | CR            | ITR   | TST          | SST  | CR             | ITR   |
| 10    | 210       | 30    | 6/7 (85.71)   | 7.691 | 270       | 30    | 7/9 (77.78)   | 6.532 | 480          | 30   | 13/16 (81.25)  | 7.024 |
| 8     | 168       | 24    | 7/7 (100)     | 12.92 | -         | -     | -             | -     | 168          | 24   | 7/7 (100)      | 12.92 |
| 6     | 72        | 18    | 4/4 (100)     | 17.23 | -         | -     | -             | -     | 72           | 18   | 4/4 (100)      | 17.23 |
| 5     | -         | -     | -             | -     | 270       | 15    | 16/18 (88.89) | 16.39 | 270          | 15   | 16/18 (88.89)  | 16.39 |
| 4     | 192       | 12    | 13/16 (81.25) | 17.56 | 96        | 12    | 8/8 (100)     | 25.85 | 288          | 12   | 21/24 (87.5)   | 19.93 |
| 3     | -         | -     | -             | -     | 333       | 9     | 30/37 (81.08) | 23.33 | 333          | 9    | 30/37 (81.08)  | 23.33 |
| total | 642       | 18.88 | 30/34 (88.24) | 12.85 | 969       | 13.46 | 61/72 (84.72) | 16.81 | 1611         | 15.2 | 91/106 (85.85) | 15.22 |

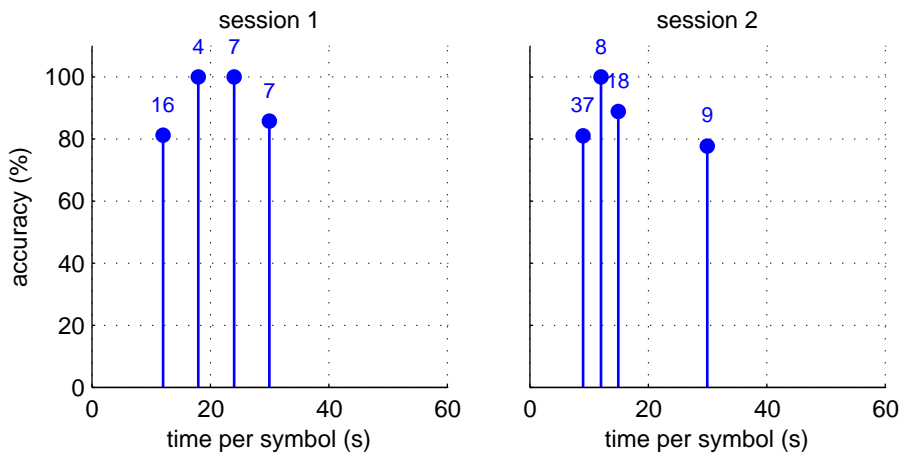

**Figure 4.** Detection accuracies for each session with patient 3 using the P3-based BCI with respect to the stimulation time per symbol. The figure above each data point represents the number of symbols communicated.

**Table 4.** detailed results for patient 4 per session using the P3-based BCI. NR represents the number of repetitions, TST the total stimulation time in seconds corresponding to the communication of all symbol, SST the stimulation time in seconds corresponding to the communication of one symbol (average for the total line), CR the correctness ratio (number of correctly detected symbol *w.r.t.* total number of typed symbols) and the corresponding accuracy (%) and ITR the Information Transfer Rate.

| NR    | session 1 |      |                |       | session 2 |       |               |       | all sessions |       |                 |       |
|-------|-----------|------|----------------|-------|-----------|-------|---------------|-------|--------------|-------|-----------------|-------|
|       | TST       | SST  | CR             | ITR   | TST       | SST   | CR            | ITR   | TST          | SST   | CR              | ITR   |
| 10    | 450       | 30   | 12/15 (80)     | 6.844 | 390       | 30    | 11/13 (84.62) | 7.523 | 840          | 30    | 23/28 (82.14)   | 7.154 |
| 8     | 648       | 24   | 19/27 (70.37)  | 6.934 | 672       | 24    | 22/28 (78.57) | 8.303 | 1320         | 24    | 41/55 (74.55)   | 7.615 |
| 7     | 126       | 21   | 6/6 (100)      | 14.77 | 420       | 21    | 15/20 (75)    | 8.79  | 546          | 21    | 21/26 (80.77)   | 9.935 |
| 6     | 360       | 18   | 15/20 (75)     | 10.25 | 234       | 18    | 11/13 (84.62) | 12.54 | 594          | 18    | 26/33 (78.79)   | 11.12 |
| 5     | 315       | 15   | 15/21 (71.43)  | 11.37 | 255       | 15    | 12/17 (70.59) | 11.15 | 570          | 15    | 27/38 (71.05)   | 11.27 |
| 4     | 168       | 12   | 11/14 (78.57)  | 16.61 | -         | -     | -             | -     | 168          | 12    | 11/14 (78.57)   | 16.61 |
| 3     | 153       | 9    | 10/17 (58.82)  | 13.87 | -         | -     | -             | -     | 153          | 9     | 10/17 (58.82)   | 13.87 |
| total | 2220      | 18.5 | 88/120 (73.33) | 9.618 | 1971      | 21.66 | 71/91 (78.02) | 9.094 | 4191         | 19.86 | 159/211 (75.36) | 9.365 |

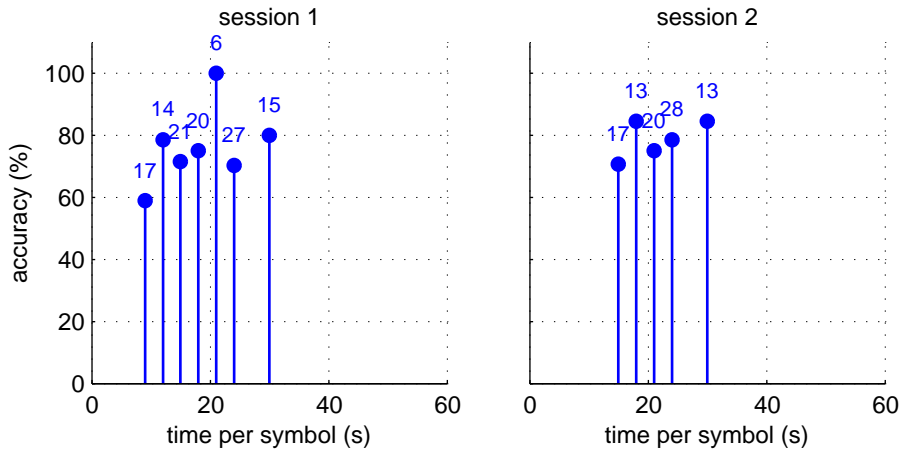

**Figure 5.** Detection accuracies for each session with patient 4 using the P3-based BCI with respect to the stimulation time per symbol. The figure above each data point represents the number of symbols communicated.

**Table 5.** detailed results for patient 5 per session using the P3-based BCI. NR represents the number of repetitions, TST the total stimulation time in seconds corresponding to the communication of all symbol, SST the stimulation time in seconds corresponding to the communication of one symbol (average for the total line), CR the correctness ratio (number of correctly detected symbol *w.r.t.* total number of typed symbols) and the corresponding accuracy (%) and ITR the Information Transfer Rate.

| NR    | session 1 |     |               |       | session 2 |       |               |       | all sessions |       |                |       |
|-------|-----------|-----|---------------|-------|-----------|-------|---------------|-------|--------------|-------|----------------|-------|
|       | TST       | SST | CR            | ITR   | TST       | SST   | CR            | ITR   | TST          | SST   | CR             | ITR   |
| 10    | 660       | 30  | 16/22 (72.73) | 5.851 | 540       | 30    | 12/18 (66.67) | 5.084 | 1200         | 30    | 28/40 (70)     | 5.5   |
| 8     | 1056      | 24  | 18/44 (40.91) | 2.907 | 456       | 24    | 8/19 (42.11)  | 3.046 | 1512         | 24    | 26/63 (41.27)  | 2.949 |
| 7     | -         | -   | -             | -     | 315       | 21    | 9/15 (60)     | 6.135 | 315          | 21    | 9/15 (60)      | 6.135 |
| total | 1716      | 26  | 34/66 (51.52) | 3.885 | 1311      | 25.21 | 29/52 (55.77) | 4.548 | 3027         | 25.65 | 63/118 (53.39) | 4.169 |

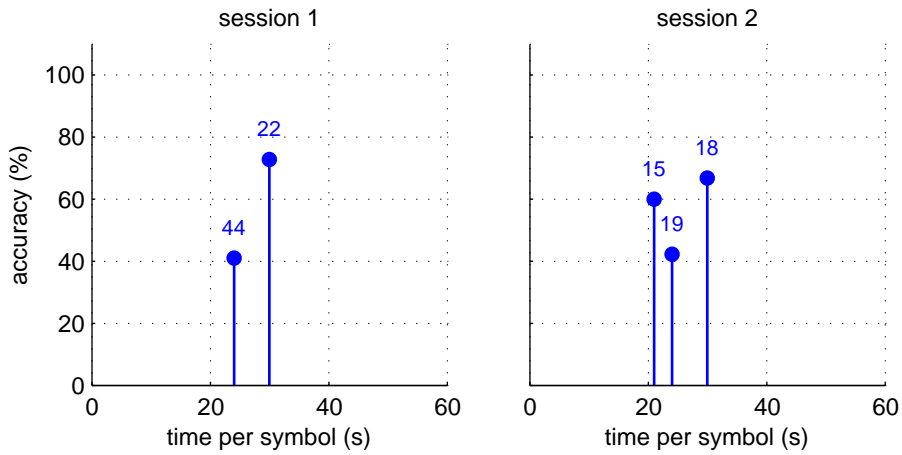

**Figure 6.** Detection accuracies for each session with patient 5 using the P3-based BCI with respect to the stimulation time per symbol. The figure above each data point represents the number of symbols communicated.

**Table 6.** detailed results for patient 6 per session using the P3-based BCI. NR represents the number of repetitions, TST the total stimulation time in seconds corresponding to the communication of all symbol, SST the stimulation time in seconds corresponding to the communication of one symbol (average for the total line), CR the correctness ratio (number of correctly detected symbol *w.r.t.* total number of typed symbols) and the corresponding accuracy (%) and ITR the Information Transfer Rate.

| NR    | session 1 |     |              |       | all sessions |     |              |       |
|-------|-----------|-----|--------------|-------|--------------|-----|--------------|-------|
|       | TST       | SST | CR           | ITR   | TST          | SST | CR           | ITR   |
| 10    | 1026      | 54  | 9/19 (47.37) | 1.636 | 1026         | 54  | 9/19 (47.37) | 1.636 |
| total | 1026      | 54  | 9/19 (47.37) | 1.636 | 1026         | 54  | 9/19 (47.37) | 1.636 |

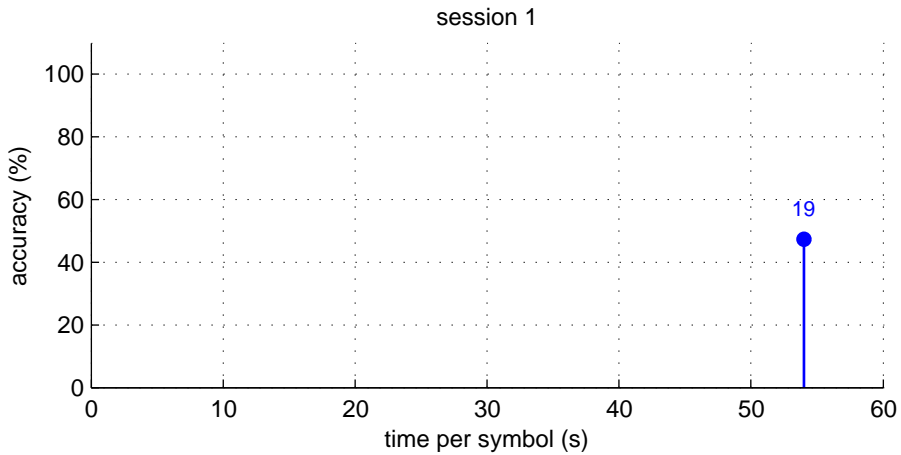

**Figure 7.** Detection accuracies for each session with patient 6 using the P3-based BCI with respect to the stimulation time per symbol. The figure above each data point represents the number of symbols communicated.

**Table 7.** detailed results for patient 7 per session using the P3-based BCI. NR represents the number of repetitions, TST the total stimulation time in seconds corresponding to the communication of all symbol, SST the stimulation time in seconds corresponding to the communication of one symbol (average for the total line), CR the correctness ratio (number of correctly detected symbol *w.r.t.* total number of typed symbols) and the corresponding accuracy (%) and ITR the Information Transfer Rate.

| NR    | session 1 |       |               |       | session 2 |     |              |        | all sessions |       |               |       |
|-------|-----------|-------|---------------|-------|-----------|-----|--------------|--------|--------------|-------|---------------|-------|
|       | TST       | SST   | CR            | ITR   | TST       | SST | CR           | ITR    | TST          | SST   | CR            | ITR   |
| 10    | 360       | 30    | 8/12 (66.67)  | 5.084 | 450       | 30  | 2/15 (13.33) | 0.3161 | 810          | 30    | 10/27 (37.04) | 1.979 |
| 8     | 120       | 24    | 2/5 (40)      | 2.804 | -         | -   | -            | -      | 120          | 24    | 2/5 (40)      | 2.804 |
| total | 480       | 28.24 | 10/17 (58.82) | 4.421 | 450       | 30  | 2/15 (13.33) | 0.3161 | 930          | 29.06 | 12/32 (37.5)  | 2.085 |

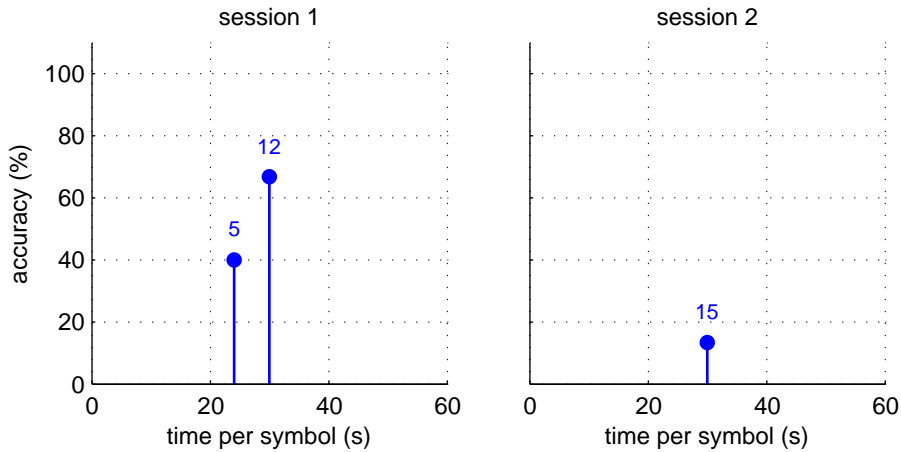

**Figure 8.** Detection accuracies for each session with patient 7 using the P3-based BCI with respect to the stimulation time per symbol. The figure above each data point represents the number of symbols communicated.
